# Supplementary material
Source: publisher figshare collection journal article supplement (https://frontiersin.figshare.com/ndownloader/files/27526601)
Supplement: Supplementary file 1 [file 27526601]

Supplementary Material

**Supplementary Table 1.** The values ofherbicide residues in water and soil used in this study.

| Herbicide | Country | Year | Herbicide residues | Average values of herbicide residues | References |
| --- | --- | --- | --- | --- | --- |
| *In water (mg/L)* | | | | | |
| Glyphosate | Argentina | 2008 | 0.1000, 0.7000 | 0.1655 | Peruzzo et al., 2008 |
| Brazil | 2014 | 0.2300, 0.2900, 0.3300 | Delmonoco et al., 2014 |
| Denmark and Greenland | 1999-2003 | 0.0001 | Kjaer et al., 2004 |
| Hungary | 2013 | 0.0010 | Mörtl et al., 2013 |
| Mexico | 2017 | 0.0014, 0.0013, 0.0013 | Osten and Dzul-Caamal, 2017 |
| 2,4-D | Australia | 2005 | 0.0002, 0.0004, 0.0006, 0.0016, 0.0019 | 0.079 | Mitchell et al., 2005 |
| Malaysia | 2007 | 0.0000084, 0.954, 0.070 | Fisher et al, 2013 |
| Malaysia | 2011 | 0.00004, 0.0149 | Ismail et al., 2011 |
| Maxico | 2013 | 0.000005 | Félix–Cañedo et al., 2013 |
| Spain | 2007 | 0.0001 | Kuster et al., 2007 |
| *In soil (mg/kg soil)* | | | | | |
| Glyphosate | Argentina | 2008 | 0.500, 5.000 | 0.165 | Peruzzo et al., 2008 |
| China | 2015 | 0.130, 0.910, 0.100, 0.140, 0.100, 0.990 | Paipard, et al. 2014 |
| European countries | 2018 | 0.020, 2.000 | Silva, et al. 2018 |
| Finland | 2007 | 0.016 | Laitinen, et al. 2007 |
| Thailand | 2014 | 9.900 | Zhang, et al., 2015 |
| 2,4-D | Brazil | 2017 | 0.000 | 0.153 | Baumgartner et al., 2005 |
| India | 2005 | 0.009, 0.016 | Kashyap et al., 2005 |
| Malaysia | 2011 | 0.046, 0.128 | Ismail et al., 2011 |
| Nigeria | 2012 | 0.013, 0.180 | Gushit et al., 2012 |
| Russia | 2016 | 1.100 | Zhichkina et al., 2020 |
| USA | 2008 | 0.0133, 0.030 | Morgan et al., 2008 |

**Supplementary Table 2.** Preliminary test for minimum inhibitory concentration(MIC) of herbicides on the growth of rice seedling.

| Treatment | Shoot Length (cm) | Root Length (cm) | Fresh weight  (g) | Dry weight  (g) | SVI |
| --- | --- | --- | --- | --- | --- |
| Control | 1.43±0.08 c | 2.99±0.35 a | 0.2001±0.0168 abc | 0.0387±0.0186 ab | 377.00±53.74 a |
| G 0.1 mg/L | 1.75±0.03 a | 2.52±0.21 b | 0.2583±0.0134 a | 0.0344±0.0023 ab | 388.50±27.578 a |
| G 0.5 mg/L | 1.50±0.02 abc | 1.21±0.01 c | 0.1908±0.0178 abc | 0.0279±0.0013 abc | **243.90±1.27* c** |
| G 1 mg/L | 1.58±0.08 abc | 1.13±0.19 c | 0.1531±0.0500 c | 0.0227±0.0012 bc | 230.05±5.59 cd |
| G 10 mg/L | 0.92±0.04 d | 0.77±0.01 c | 0.1416±0.0117 c | 0.0230±0.0006 bc | 169.00±5.66 de |
| D 0.1 mg/L | 1.80±0.33 ab | 1.06±0.29 c | 0.2310±0.0340 ab | 0.0465±0.0064 a | **308.00±31.11* b** |
| D 0.5 mg/L | 1.59±0.09 abc | 0.81±0.06 c | 0.2305±0.0276 ab | 0.0325±0.0021 ab | 223.50±38.89 cd |
| D 1 mg/L | 1.68±0.04 abc | 1.01±0.14 c | 0.2455±0.0446 a | 0.0355±0.0106 ab | 277.50±2.12 bc |
| D 10 mg/L | 1.47±0.00 bc | 0.00±0.00 d | 0.1585±0.0262 bc | 0.0125±0.0007 c | 140.15±11.10 e |

G = Glyphosate, D = 2,4-D, SVI = Seedling Vigor Index

*0.5 mg/L of glyphosate and 0.1 mg/L of 2,4-D were selected as the minimum inhibitory concentration (MIC) of herbicides on the growth of rice seedling according to their significant lower SVI compared with the control.

**Supplementary Table 3.** Experimental treatments for the determination of effects of herbicides and *Nostoc* sp. N1 on the germination of rice seedlings.

| Treatment | *Nostoc* cells (g/L) | | Glyphosate herbicide  (mg/L) | | | | Treatment | *Nostoc* cells (g/L) | | 2,4-D herbicide  (mg/L) | | | |
| --- | --- | --- | --- | --- | --- | --- | --- | --- | --- | --- | --- | --- | --- |
| 5.0 | 10.0 | 0.5 | 1.0 | 2.5 | 5.0 | 5.0 | 10.0 | 0.01 | 0.1 | 1.0 | 5.0 |
| *Glyphosate experiment* | | | | | | | *2,4-D experiment* | | | | | | |
| Control | **-** | **-** | **-** | **-** | **-** | **-** | Control | **-** | **-** | **-** | **-** | **-** | **-** |
| T1 | **/** | **-** | **-** | **-** | **-** | **-** | T1 | **/** | **-** | **-** | **-** | **-** | **-** |
| T2 | **-** | **/** | **-** | **-** | **-** | **-** | T2 | **-** | **/** | **-** | **-** | **-** | **-** |
| T3 | **-** | **-** | **/** | **-** | **-** | **-** | T3 | **-** | **-** | **/** | **-** | **-** | **-** |
| T4 | **-** | **-** | **-** | **/** | **-** | **-** | T4 | **-** | **-** | **-** | **/** | **-** | **-** |
| T5 | **-** | **-** | **-** | **-** | **/** | **-** | T5 | **-** | **-** | **-** | **-** | **/** | **-** |
| T6 | **-** | **-** | **-** | **-** | **-** | **/** | T6 | **-** | **-** | **-** | **-** | **-** | **/** |
| T7 | **/** | **-** | **/** | **-** | **-** | **-** | T7 | **/** | **-** | **/** | **-** | **-** | **-** |
| T8 | **/** | **-** | **-** | **/** | **-** | **-** | T8 | **/** | **-** | **-** | **/** | **-** | **-** |
| T9 | **/** | **-** | **-** | **-** | **/** | **-** | T9 | **/** | **-** | **-** | **-** | **/** | **-** |
| T10 | **/** | **-** | **-** | **-** | **-** | **/** | T10 | **/** | **-** | **-** | **-** | **-** | **/** |
| T11 | **-** | **/** | **/** | **-** | **-** | **-** | T11 | **-** | **/** | **/** | **-** | **-** | **-** |
| T12 | **-** | **/** | **-** | **/** | **-** | **-** | T12 | **-** | **/** | **-** | **/** | **-** | **-** |
| T13 | **-** | **/** | **-** | **-** | **/** | **-** | T13 | **-** | **/** | **-** | **-** | **/** | **-** |
| T14 | **-** | **/** | **-** | **-** | **-** | **/** | T14 | **-** | **/** | **-** | **-** | **-** | **/** |

**Supplementary Table 4.** Calculation of phytotoxicity index (PI).

| Treatment | SL | RL | FW | DW | PI* | Treatment | SL | RL | FW | DW | PI |
| --- | --- | --- | --- | --- | --- | --- | --- | --- | --- | --- | --- |
| Control | 0 | 0 | 0 | 0 | 0.00 | Control | 0 | 0 | 0 | 0 | 0.00 |
| N 5.0 g/L | -2 | -2 | -1 | -1 | -1.5 | N 5.0 g/L | -1 | -1 | -1 | -2 | -1.25 |
| N 10.0 g/L | -2 | -2 | -1 | -1 | -1.5 | N 10.0 g/L | -1 | -3 | -1 | -3 | -2.00 |
| G 0.5 mg/L | -1 | 1 | 1 | 1 | 0.50 | D 0.01 mg/L | -1 | -2 | 1 | -2 | -1.00 |
| G 1.0 mg/L | 1 | 2 | 1 | 1 | 1.25 | D 0.1 mg/L | -1 | 3 | -1 | -2 | -0.25 |
| G 2.5 mg/L | 3 | 3 | 2 | 2 | 2.50 | D 1.0 mg/L | -1 | 3 | -1 | -2 | -0.25 |
| G 5.0 mg/L | 3 | 4 | 2 | 2 | 2.75 | D 5.0 mg/L | 2 | 4 | 2 | 1 | 2.25 |
| N 5.0+G 0.5 | -2 | -1 | -1 | -1 | -1.25 | N 5.0+D 0.01 | -1 | -1 | -1 | -2 | -1.25 |
| N 5.0+G 1.0 | -1 | 1 | -1 | -1 | 0.50 | N 5.0+ D 0.1 | -1 | 2 | 1 | -1 | 0.25 |
| N 5.0+ G2.5 | 1 | 3 | 1 | 1 | 1.50 | N 5.0+ D 1.0 | 1 | 1 | 1 | -2 | 0.25 |
| N 5.0+ G 5.0 | 3 | 4 | 2 | 2 | 2.75 | N 5.0+ D 5.0 | 2 | 4 | 2 | 1 | 2.25 |
| N 10.0+ G 0.5 | -1 | 1 | -1 | -1 | 0.50 | N 10.0+D 0.01 | -1 | -1 | 1 | -2 | -0.75 |
| N 10.0+ G 1.0 | -1 | 1 | -1 | -1 | 0.50 | N 10.0+ D 0.1 | -1 | 2 | -1 | -2 | -0.50 |
| N 10.0+ G 2.5 | 1 | 2 | 1 | 1 | 1.25 | N 10.0+ D 1.0 | 1 | 2 | -1 | -2 | 0.00 |
| N 10.0+ G 5.0 | 3 | 3 | 2 | 2 | 2.50 | N 10.0+ D 5.0 | 2 | 4 | 2 | 1 | 2.25 |

N = *Nostoc* sp. N1; G = Glyphosate herbicide; SL = Shoot length; RL = Root length; FW = Fresh weight; DW = Dry weight

*Phytotoxicity index were classified according to the reduction (%) in different growth parameters, i.e., shoot length, root length, fresh weight and dry weight due to herbicide toxicity or improvement (%) in different parameters due to *Nostoc* sp. N1 cells addition. Different levels classified are level 1 (0–25%), level (26–50%), level 3 (51–75%), level 4 (>75%) and correspondingly negative values were classified for increase (%) in growth of rice.

**Supplementary Table 5.** Effects of glyphosate herbicide and *Nostoc* sp. N1 cells on the germination and growth parameters of 7-day-old rice seedlings

| Treatment | growth parameters | | | |
| --- | --- | --- | --- | --- |
| Shoot length  (cm) | Root length  (cm) | Fresh weight  (g) | Dry weight  (g) | |
| Control | 3.38±0.08 de | 4.08±0.23 cd | 0.30±0.02 abc | 0.0435±0.0013 cde | |
| N 5 g/L | 4.24±0.18 ab | 5.15±0.29 ab | 0.35±0.03 ab | 0.0528±0.0036 ab | |
| N 10 g/L | 4.66±0.43 a | 5.49±1.19 a | 0.36±0.05 a | 0.0572±0.0053 a | |
| G 0.5 mg/L | 3.44±0.24 cde | 3.25±0.44 e | 0.28±0.02 c | 0.0407±0.0042 de | |
| G 1 mg/L | 3.23±0.18 e | 2.41±0.26 f | 0.27±0.03 cd | 0.0388±0.0056 e | |
| G 2.5 mg/L | 1.60±0.40 g | 1.42±0.31 gh | 0.22±0.01 de | 0.0304±0.0021 fg | |
| G 5 mg/L | 0.89±0.10 i | 0.67±0.07 h | 0.17±0.03 e | 0.0243±0.0031 g | |
| N 5+ G 0.5 | 4.39±0.04 a | 4.68±0.19 bc | 0.35±0.07 ab | 0.0502±0.0051 abc | |
| N 5+G 1 | 3.89±0.56 bc | 3.39±0.44 de | 0.33±0.03 abc | 0.0471±0.0052 bcd | |
| N 5+G 2.5 | 2.59±0.12 f | 1.69±0.28 fg | 0.29±0.03 bc | 0.0372±0.0052 ef | |
| N 5+G 5 | 0.98±0.15 hi | 0.94±0.10 gh | 0.20±0.04 e | 0.0284±0.0030 g | |
| N 10+G 0.5 | 3.76±0.36 cd | 4.06±0.60 cd | 0.31±0.03 abc | 0.0441±0.0021 cde | |
| N 10+G 1 | 3.58±0.07 cde | 3.33±0.39 de | 0.31±0.03 abc | 0.0401±0.0079 de | |
| N 10+G 2.5 | 2.57±0.21 f | 2.17±0.04 f | 0.27±0.01 cd | 0.0382±0.0013 e | |
| N 10+G 5 | 1.35±0.02 gh | 0.88±0.01 h | 0.21±0.02 de | 0.0296±0.0011 g | |

N = *Nostoc* sp. N1; G = Glyphosate herbicide

a–i Means followed by the same letter are not significantly different at *P* = 0.05

**Supplementary Table 6.** Effects of 2,4-D herbicide and *Nostoc* sp. N1 cells on the germination and growth parameters of 7-day-old rice seedlings

| Treatment | Germination and growth parameters | | | |
| --- | --- | --- | --- | --- |
| Shoot length  (cm) | Root length  (cm) | Fresh weight  (g) | Dry weight  (g) | |
| Control | 3.45±0.24 a | 2.76±1.19 bc | 0.28±0.01 ab | 0.0472±0.0019 bc | |
| N 5 g/L | 3.61±0.34 a | 3.25±1.20 ab | 0.30±0.02 ab | 0.0512±0.0010 ab | |
| N 10 g/L | 3.74±0.28 a | 4.16±0.20 a | 0.30±0.02 ab | 0.0575±0.0051 a | |
| D 0.01 mg/L | 3.64±0.48 a | 4.03±0.29 a | 0.26±0.02 b | 0.0451±0.0071 bc | |
| D 0.1 mg/L | 3.72±0.13 a | 1.29±0.22 de | 0.31±0.01 ab | 0.0526±0.0079 ab | |
| D 1 mg/L | 3.48±0.36 a | 1.32±0.17 de | 0.29±0.03 ab | 0.0487±0.0072 bc | |
| D 5 mg/L | 2.47±0.18 bc | 0.00±0.00 f | 0.18±0.02 c | 0.0233±0.0020 d | |
| N 5+D 0.01 | 3.78±0.14 a | 3.27±0.63 ab | 0.31±0.02 ab | 0.0505±0.0039 abc | |
| N 5+D 0.1 | 3.70±1.27 a | 1.69±0.29 cd | 0.27±0.03 ab | 0.0420±0.0014 c | |
| N 5+D 1 | 3.10±0.84 ab | 2.11±1.37 cd | 0.27±0.03 ab | 0.0471±0.0014 bc | |
| N 5+D 5 | 2.12±0.08 c | 0.23±0.05 ef | 0.17±0.01 c | 0.0230±0.0017 d | |
| N 10+D 0.01 | 3.58±0.18 a | 3.35±0.38 ab | 0.27±0.04 ab | 0.0485±0.0021 ab | |
| N 10+D 0.1 | 3.82±0.33 a | 1.93±0.07 cd | 0.33±0.02 a | 0.0527±0.0006 bc | |
| N 10+D 1 | 3.30±0.49 a | 1.79±0.20 cd | 0.30±0.05 ab | 0.0462±0.0049 bc | |
| N 10+D 5 | 2.30±0.05 bc | 0.32±0.14 ef | 0.19±0.01 c | 0.0247±0.0029 d | |

N = *Nostoc* sp. N1; D = 2,4-D herbicide

a–f Means followed by the same letter are not significantly different at *P* = 0.05


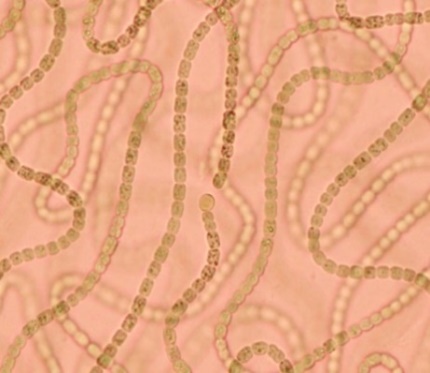

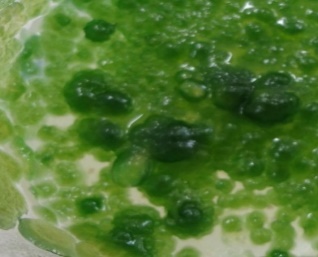
**
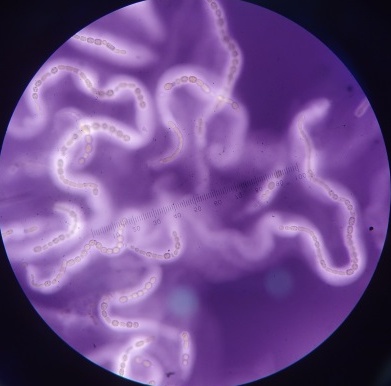
**

(C)

(B)

(A)

**Supplementary Figure 1.** Morphological study of *Nostoc* sp. cells. (A) *Nostoc* colonies enveloped by mucilage. (B) Vegetative cells of *Nostoc* sp. cultivated under N-free BG11 media (the arrow indicate heterocyst). (C) Nigrosin staining showing the production of large amounts of mucus covering the *Nostoc* sp. cells.


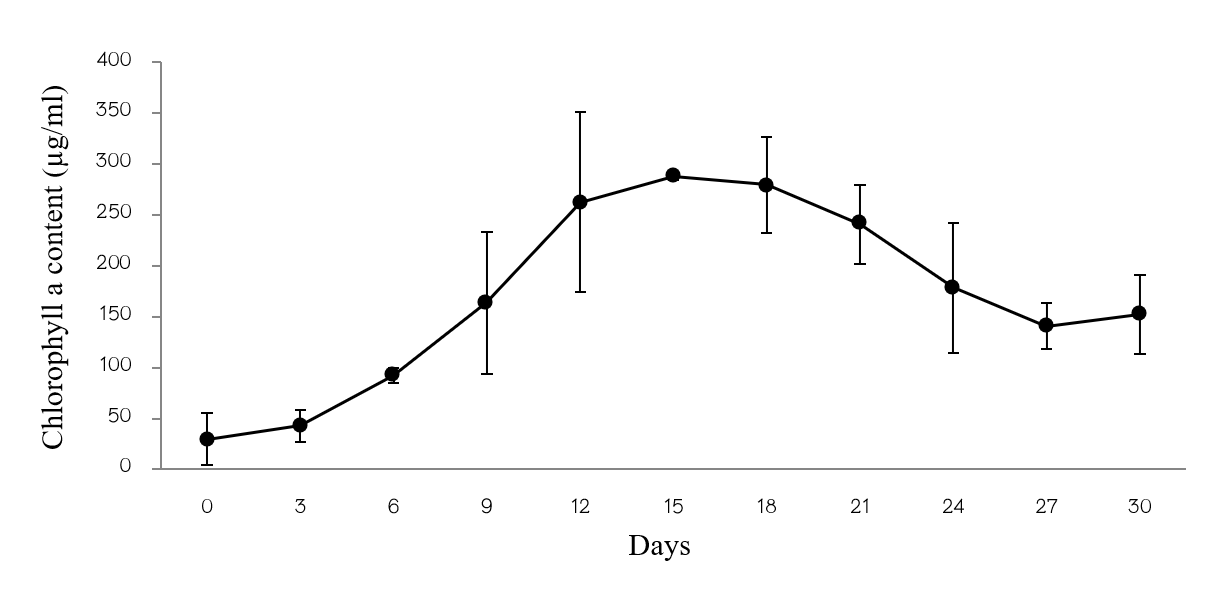
**Supplementary** **Figure 2.** Growth curve of *Nostoc* sp. N1.

**References for supplementary materials**

Baumgartner, D., Souza, E.G.D., Coelho, S.R.M., and Maggi, M.F. (2017). Correlation between 2,4-D herbicide residues and soil attributes in southern of Brazil. *Rev. Ciênc. Agron*. 48, 428–437. doi.org/10.5935/1806-6690.20170050

Delmonoco, E.L., Bertozzi, J., Souza, N. and Oliveira, C.C. (2014). Determination of glyphosate and aminomethylphosphonic acid for assessing the quality tap water using SPE and HPLC. *Acta Sci. Technol*., 36, 513-519. doi.org/10.4025/actascitechnol.v36i3.22406

Félix–Cañedo, T.E., Durán–Álvarez, J.C., and Jiménez–Cisneros, B. (2013). The occurrence and distribution of a group of organic micropollutants in Mexico City's water source. *Sci. Total Environ.* 454-455,109-118. doi.org/10.1016/j.scitotenv.2013.02.088

Fisher, R.S., Davidson, B., and Goodmann, P.T. (2007)*. Groundwater quality in watersheds of the Kentucky River, Salt River, Licking River, Big Sandy River, Little Sandy River, and Tygarts Creek.* Kentucky Geological Survey, University of Kentucky. Available online at: <https://kgs.uky.edu/kgsweb/olops/pub/kgs/water/RI16_12/RI16entire.pdf> [Accessed March 2019].

Gushit, J.S., Ekanem, E.O., Adamu, H.M., and Abayeh, O.J. (2012). The Persistence of Herbicide Residues in Fadama and Upland Soils in Plateau State, Nigeria. Environ. Earth Sci., 2, 148-156. Available online at: <https://www.iiste.org/Journals/index.php/JEES/article/view/3307> [Accessed May 2020].

Ismail, B.S., Sameni, M., and Muhamad, H. (2011). Evaluation of herbicide pollution in the kerian rice fields of Perak, Malaysia. *World Appl. Sci. J*. 15:1, 5–13.

Kashyap, S.M., Pandya, G.H., Kondawar, V.K. and Gabhane, S.S. (2005). Rapid analysis of 2,4-D in soil samples by modified soxhlet apparatus using HPLC with UV detection. *J. Chromatogr. Sci.*, 43, 81-86. doi.org/10.1093/chromsci/43.2.81

Kjaer, J., Olsen, P., Barlebo, H. C.,. Juhler, R.K., Plauborg, F. and Grant, R., et al. (2004). *The Danish pesticide leaching assessment programme: monitoring results 1999–2003*. Available online at: https://www.researchgate.net/publication/216075829_The_Danish_Pesticide_Leaching_Assessment_Programme_Monitoring_results_1999-2003 [Accessed November 2020]

Kuster, M., de Alda, M.J.L., M. Hernando, D.M., Petrovic, M., Martin-Alonso, J., and Barcelo, D. (2007). Analysis and occurrence of pharmaceuticals, estrogens, progestogens and polar pesticides in sewage treatment plant effluents, river water and drinking water in the Llobregat river basin (Barcelona, Spain). *J. Hydrol*. 358, 112-123. doi.org/10.1016/j.jhydrol.2008.05.030

Laitinen, P., Ramo, S. and Siimes, K. (2007). Glyphosate translocation from plants to soil - Does this constitute a significant proportion of residues in soil?. *Plant Soil* 300, 51-60. doi.org/10.1007/s11104-007-9387-1

Mitchell, C., Bodia J., and White, I. (2005). Sediments, nutrients and pesticide residues in event flow conditions. *Mar. Pollut. Bull*. 51, 23-36. doi: 10.1016/j.marpolbul.2004.10.036.

Morgan, M.K., Sheldon, L.S., Thomas, K.W., Egeghy, P.P., Croghan, C.W., and Paul, A.J. (2008). Adult and children's exposure to 2,4-D from multiple sources and pathways. *J. Expo. Sci. Environ. Epidemiol*. 18, 486-494. doi.org/10.1038/sj.jes.7500641

Mörtl, M., Németh, G., Juracsek, J., Darvas, B., Kamp, L., Rubio, F., et al. (2013). Determination of glyphosate residues in Hungarian water samples by immune assay. *Microchem. J.* 107, 143-151. doi.org/10.1016/j.microc.2012.05.021

Osten, J. R., and Dzul-Caamal, R. (2017). Glyphosate Residues in Groundwater, Drinking Water and Urine of Subsistence Farmers from Intensive Agriculture Localities: A Survey in Hopelchén, Campeche, Mexico. *Int. J. Environ. Res. Public Health* 14, 595. doi: 10.3390/ijerph14060595.

Paipard, N., Supannatas, S., and Suttiprapa, T. (2014). Effects of pesticide use on farmer’s health and the environment in Rong Kham district, Kalasin province. *Khon Kaen Agr. J*. 42, 301–310. Available online at: <https://ag2.kku.ac.th/kaj/PDF.cfm?filename=05%20Natawut.pdf&id=1711&keeptrack=3> [Accessed June 2020]

Peruzzo, P.J., Porta, A. and Ronco A.E. (2018). Levels of glyphosate in surface waters, sediments and soils associated with direct sowing soybean cultivation in North Pampasic region of Argentina. *Environ. Pollut.* 156, 61-66. doi.org/10.1016/j.envpol.2008.01.015

Silva, V., Montanarella, L., Jones, A., Fernandez-Ugalde, O., Mol, H.G.J., Ritsema, C.J., et al. (2018). Distribution of glyphosate and aminomethylphosphonic acid (AMPA) in agricultural topsoils of the European Union.  *Sci. Total Environ*. 621, doi:10.1016/j.scitotenv.2017.10.093

Zhang, C., Hu, X., Luo, J., Wu, Z., Wang, L., Li, B., Wang, Y., and Sun, G. (2015). Degradation dynamics of glyphosate in different types of citrus orchard soils in China.  *Molecules* 20, 1161–1175 . doi.org/10.3390/molecules20011161

Zhichkina, L., Nosov, V., Zhichkin, K., Zhenzhebir, V., Abramov, Y. and Alborova, M. (2020). Pesticide monitoring of agricultural soil pollution. E3S Web Conf. 193, 01068. doi.org/10.1051/e3sconf/202019301068
